# Supplementary material
Source: PubMed Central journal article supplement (PMC3697591)

Supplementary Table 1

Oligonucleotides used in this study.

| Name/target                        | Forward 5' -> 3'                       | Reverse 5' -> 3'                    |
|------------------------------------|----------------------------------------|-------------------------------------|
| A1S_r01<br>(16S rRNA) <sup>a</sup> | CAGCTCGTGTCTGAGATGT                    | CGTAAGGGCCATGATGACTT                |
| A1S_0111                           | TTGGTCGAGTCAATCTGCAA                   | CTCGGGTCCCAATAAAATCA                |
| A1S_0112                           | ACGCCAGTCTGGTGGTATTC                   | AGGTTCGAACAGCAATACGG                |
| A1S_1032                           | AAGCCAGTCAAGCAACTGGT                   | TCAGAATCTGCTGCACCATC                |
| A1S_1292                           | ACGCAACGCGTAATAAAGTG                   | TAAAGGGTCAAAGGGCGAAC                |
| A1S_1509                           | CCAAGGAAGGCGCTGT                       | TTGGGGAATGGCTTGC                    |
| A1S_1699                           | CAAAGACATTGCTGGTCGTG                   | AATCACGCTTGGACCTTCAC                |
| A1S_3273                           | GGGTACACCTTCAGCAGAGC                   | GCACCATATTTACGGGCAAC                |
| A1S_0095                           | CCGCAAAGTTATGCTGTGAA                   | GACGTAAACCCGTCCAGAAA                |
| A1S_1336                           | CGTGCGATGGTACGTATTTG                   | ACGGTTCACTGCATCTTGTG                |
| A1S_0268                           | GAGAGGATCCATAAATATTA<br>AGAAAATATATTAC | GAGAGGATCCTTAGATTAAGAA<br>ATCTTCAAG |
| A1S_2562                           | CACCATGAATATGCTCAAAGA<br>CAT           | GGTTGAAATGGTCTCACCAACTG<br>G        |

<sup>a</sup> Oligonucleotide sequences obtained from **Higgins et al.** 2004 J Antimicrob Chemother **54**: 821-823.

**Supplementary Table 2****Genes up-regulated more than 4-fold in strain 17978hm**

| <b>Locus-tag</b> | <b>Gene product</b>                                                                | <b>Times-fold difference</b> |
|------------------|------------------------------------------------------------------------------------|------------------------------|
| A1S_0109         | homoserine lactone synthase                                                        | 30.7                         |
| A1S_0110         | hypothetical protein                                                               | 7.9                          |
| A1S_0111         | eR transcriptional regulator                                                       | 5.7                          |
| A1S_0112         | Acyl-CoA synthetase/AMP-acid ligases II                                            | 558.6                        |
| A1S_0113         | Acyl-CoA dehydrogenase                                                             | 536.6                        |
| A1S_0114         | Acyl carrier protein                                                               | 727.2                        |
| A1S_0115         | Amino acid adenylation                                                             | 611.4                        |
| A1S_0116         | RND superfamily-like exporters                                                     | 240.6                        |
| A1S_0117         | hypothetical protein                                                               | 211.4                        |
| A1S_0118         | hypothetical protein                                                               | 53.8                         |
| A1S_0119         | Phosphopantethiene-protein transferase                                             | 47.1                         |
| A1S_0628         | putative transposase                                                               | 42.9                         |
| A1S_0739         | putative transcriptional regulator                                                 | 4.1                          |
| A1S_0745         | hypothetical protein                                                               | 21.7                         |
| A1S_0921         | arginine/ornithine antiporter                                                      | 4.5                          |
| A1S_0922         | putative homocysteine S-methyltransferase family protein                           | 4.3                          |
| A1S_1032         | hypothetical protein                                                               | 10.0                         |
| A1S_1033         | putative antigen                                                                   | 8.0                          |
| A1S_1078         | hypothetical protein                                                               | 6.4                          |
| A1S_1079         | dichlorophenol hydroxylase (EC:1.14.13.20 )                                        | 10.6                         |
| A1S_1081         | putative transcriptional regulator                                                 | 6.2                          |
| A1S_1256         | putative transcriptional regulator                                                 | 21.4                         |
| A1S_1272         | putative transcriptional regulator                                                 | 4.8                          |
| A1S_1292         | putative signal peptide                                                            | 49.0                         |
| A1S_1293         | hypothetical protein                                                               | 35.7                         |
| A1S_1294         | hypothetical protein                                                               | 34.4                         |
| A1S_1295         | hypothetical protein                                                               | 13.5                         |
| A1S_1296         | hypothetical protein                                                               | 4.6                          |
| A1S_1297         | hypothetical protein                                                               | 5.8                          |
| A1S_1304         | hypothetical protein                                                               | 4.7                          |
| A1S_1357         | alanine racemase                                                                   | 70.9                         |
| A1S_1384         | CinA-like protein                                                                  | 5.7                          |
| A1S_1404         | putative cysteine desulfurase 1 (Csd)                                              | 4.7                          |
| A1S_1405         | putative cysteine desulfurase 1 (Csd)                                              | 5.7                          |
| A1S_1406         | major membrane protein I (MMP-I)                                                   | 5.8                          |
| A1S_1407         | serine acetyltransferase                                                           | 4.4                          |
| A1S_1408         | putative rhodanese-related sulfurtransferase                                       | 5.2                          |
| A1S_1438         | putative coenzyme F420-dependent N5N10-methylene tetrahydromethanopterin reductase | 12.9                         |
| A1S_1439         | putative coenzyme F420-dependent N5N10-methylene tetrahydromethanopterin reductase | 16.8                         |
| A1S_1440         | putative transporter (MFS superfamily)                                             | 4.2                          |
| A1S_1507         | fimbrial protein                                                                   | 13.8                         |
| A1S_1508         | fimbrial biogenesis outer membrane usher protein                                   | 18.3                         |
| A1S_1509         | pili assembly chaperone                                                            | 17.2                         |
| A1S_1510         | fimbrial protein                                                                   | 12.2                         |
| A1S_1699         | acetoin:26-dichlorophenolindophenol oxidoreductase alpha subunit                   | 7.4                          |
| A1S_1700         | acetoin:26-dichlorophenolindophenol oxidoreductase beta subunit (EC:1.2.4.1 )      | 7.3                          |
| A1S_1701         | dihydrolipoamide acetyltransferase                                                 | 5.5                          |
| A1S_1702         | dihydrolipoamide dehydrogenase                                                     | 6.2                          |
| A1S_1703         | dihydrolipoamide dehydrogenase                                                     | 6.7                          |
| A1S_1751         | AdeA membrane fusion protein                                                       | 8.7                          |
| A1S_1769         | putative RND family drug transporter                                               | 5.1                          |
| A1S_1770         | hypothetical protein                                                               | 5.3                          |
| A1S_2396         | putative transcriptional regulator                                                 | 4.1                          |
| A1S_2554         | putative transposase                                                               | 27.6                         |
| A1S_2647         | putative transcriptional regulator                                                 | 4.1                          |
| A1S_2648         | hypothetical protein                                                               | 6.9                          |
| A1S_2649         | putative regulatory protein                                                        | 6.9                          |
| A1S_3104         | putative ATP-dependent RNA helicase                                                | 4.5                          |
| A1S_3120         | hypothetical protein                                                               | 4.2                          |
| A1S_3146         | multidrug efflux transport protein                                                 | 4.1                          |
| A1S_3273         | putative peptide signal                                                            | 4.8                          |

**Genes down-regulated more than 4-fold in strain 17978hm**

| <b>Locus-tag</b> | <b>Gene product</b>                       | <b>Times-fold difference</b> |
|------------------|-------------------------------------------|------------------------------|
| A1S_1186         | ATP-dependent protease Hsp 100            | -26.7                        |
| A1S_2183         | putative signal peptide                   | -21.1                        |
| A1S_1950         | putative universal stress protein         | -19.9                        |
| A1S_0095         | D-amino acid dehydrogenase (EC:1.4.99.1 ) | -17.4                        |
| A1S_0771         | hypothetical protein                      | -16.6                        |
| A1S_3113         | hypothetical protein                      | -16.0                        |
| A1S_3350         | hypothetical protein                      | -14.4                        |
| A1S_2195         | hypothetical protein                      | -12.6                        |
| A1S_1708         | beta-lactamase-like protein               | -12.2                        |
| A1S_3317         | putative outer membrane protein           | -12.2                        |
| A1S_1030         | DNA-binding ATP-dependent protease La     | -12.1                        |
| A1S_1932         | hypothetical protein                      | -10.9                        |
| A1S_2960         | chaperone Hsp70                           | -10.6                        |
| A1S_0096         | alanine racemase 2 PLP-binding, catabolic | -9.7                         |

|          |                                                      |      |
|----------|------------------------------------------------------|------|
| A1S_2093 | hypothetical protein                                 | -8.9 |
| A1S_0558 | aconitate hydratase 1 (EC:4.2.1.3 )                  | -8.8 |
| A1S_1193 | OmpA/MotB                                            | -8.8 |
| A1S_3175 | bacterioferritin                                     | -8.6 |
| A1S_2070 | P-type ATPase Mg2+ ATPase transporter (EC:3.6.3.2 )  | -8.4 |
| A1S_1031 | DNA-binding ATP-dependent protease La                | -8.2 |
| A1S_1687 | transcriptional regulator                            | -8.1 |
| A1S_1338 | hypothetical protein                                 | -8.1 |
| A1S_0800 | bacterioferritin                                     | -8.0 |
| A1S_1046 | Lysine exporter protein (LysE/YggA)                  | -7.9 |
| A1S_3023 | hypothetical protein                                 | -7.8 |
| A1S_1984 | D-amino acid dehydrogenase small subunit             | -7.7 |
| A1S_0363 | hypothetical protein                                 | -7.2 |
| A1S_0683 | putative sigma (54) modulation protein RpoX          | -6.9 |
| A1S_2538 | outer membrane protein CarO precursor                | -6.8 |
| A1S_1266 | hypothetical protein                                 | -6.8 |
| A1S_1337 | Phenylacetic acid degradation B                      | -6.7 |
| A1S_2820 | hypothetical protein                                 | -6.7 |
| A1S_1339 | Phenylacetate-CoA oxygenase PaaJ subunit             | -6.6 |
| A1S_3277 | putative pirin-like protein                          | -6.5 |
| A1S_0301 | hypothetical protein                                 | -6.5 |
| A1S_1267 | putative lactam utilization protein                  | -6.4 |
| A1S_1910 | ATP-binding protease component                       | -6.4 |
| A1S_1246 | putative universal stress protein                    | -6.1 |
| A1S_0445 | hypothetical protein                                 | -6.1 |
| A1S_0097 | hypothetical protein                                 | -6.1 |
| A1S_1270 | hypothetical protein                                 | -5.9 |
| A1S_3046 | oligopeptidase A                                     | -5.8 |
| A1S_2296 | putative protease                                    | -5.8 |
| A1S_1269 | putative allophanate hydrolase subunit 1 and 2       | -5.8 |
| A1S_1340 | Phenylacetate-CoA oxygenase/reductase PaaK subunit   | -5.8 |
| A1S_2809 | bacteriolytic lipoprotein entericidin B              | -5.8 |
| A1S_1343 | PaaC                                                 | -5.7 |
| A1S_1268 | hypothetical protein                                 | -5.6 |
| A1S_2616 | hypothetical protein                                 | -5.5 |
| A1S_0210 | transposase                                          | -5.5 |
| A1S_2664 | chaperone Hsp60                                      | -5.4 |
| A1S_2291 | hypothetical protein                                 | -5.3 |
| A1S_1342 | putative enoyl-CoA hydratase II                      | -5.3 |
| A1S_2450 | putative pyruvate decarboxylase                      | -5.2 |
| A1S_2259 | putative signal peptide                              | -5.2 |
| A1S_2840 | outer membrane protein A                             | -5.2 |
| A1S_2959 | Hsp 24 nucleotide exchange factor                    | -5.1 |
| A1S_1925 | cytochrome d terminal oxidase polypeptide subunit II | -5.1 |
| A1S_1433 | ubiquinol oxidase subunit II                         | -5.1 |
| A1S_0207 | hypothetical protein                                 | -5.1 |
| A1S_0646 | IcmB protein                                         | -5.0 |
| A1S_2449 | aromatic amino acid transporter (APC family)         | -5.0 |
| A1S_0172 | hypothetical protein                                 | -5.0 |
| A1S_2072 | putative universal stress protein family             | -4.9 |
| A1S_1518 | putative suppressor of F exclusion of phage T7       | -4.9 |
| A1S_1390 | hypothetical protein                                 | -4.8 |
| A1S_1862 | hypothetical protein                                 | -4.8 |
| A1S_0496 | putative phosphatidylglycerophosphatase B            | -4.7 |
| A1S_0412 | catalase (EC:1.11.1.6 )                              | -4.7 |
| A1S_1926 | hypothetical protein                                 | -4.7 |
| A1S_0884 | putative outer membrane protein                      | -4.7 |
| A1S_1726 | aspartate ammonia-lyase (aspartase) (EC:4.3.1.1 )    | -4.6 |
| A1S_2416 | hypothetical protein                                 | -4.6 |
| A1S_3180 | putative signal peptide                              | -4.5 |
| A1S_1335 | Phenylacetic acid degradation protein paaN           | -4.5 |
| A1S_1924 | cytochrome d terminal oxidase polypeptide subunit I  | -4.4 |
| A1S_1861 | benzoate dioxygenase large subunit                   | -4.4 |
| A1S_0627 | hypothetical protein                                 | -4.4 |
| A1S_2417 | starvation-induced peptide utilization protein       | -4.3 |
| A1S_0642 | hypothetical protein                                 | -4.3 |
| A1S_1336 | hypothetical protein                                 | -4.2 |
| A1S_1859 | aromatic-ring-hydroxylating dioxygenase beta subunit | -4.2 |
| A1S_2696 | hypothetical protein                                 | -4.2 |
| A1S_3122 | hypothetical protein                                 | -4.2 |
| A1S_2092 | aminopeptidase N                                     | -4.1 |
| A1S_0299 | hypothetical protein                                 | -4.1 |
| A1S_2886 | acyl-CoA dehydrogenase                               | -4.1 |
| A1S_0465 | Sec-independent protein translocase protein          | -4.1 |
| A1S_0634 | hypothetical protein                                 | -4.0 |
| A1S_3246 | hypothetical protein                                 | -4.0 |
| A1S_2504 | excinuclease ABC subunit B                           | -4.0 |

**Supplementary Table 3**  
**PM1 MicroPlate™ Carbon Sources**

|                                  |                                               |                                          |                                  |                            |                                                               |                                             |                                            |                                    |                               |                             |                           |
|----------------------------------|-----------------------------------------------|------------------------------------------|----------------------------------|----------------------------|---------------------------------------------------------------|---------------------------------------------|--------------------------------------------|------------------------------------|-------------------------------|-----------------------------|---------------------------|
| A1<br>Negative<br>Control        | A2<br>L-Arabinose                             | A3<br>N-Acetyl-D-<br>Glucosamine         | A4<br>D-Saccharic<br>Acid        | A5<br>Succinic Acid        | A6<br>D-Galactose                                             | A7<br>L-Aspartic Acid                       | A8<br>L-Proline                            | A9<br>D-Alanine                    | A10<br>D-Trehalose            | A11<br>D-Mannose            | A12<br>Dulcitol           |
| B1<br>D-Serine                   | B2<br>D-Sorbitol                              | B3<br>Glycerol                           | B4<br>L-Fucose                   | B5<br>D-Glucuronic<br>Acid | B6<br>D-Gluconic<br>Acid                                      | B7<br>D,L- $\alpha$ -Glycerol-<br>Phosphate | B8<br>D-Xylose                             | B9<br>L-Lactic Acid                | B10<br>Formic Acid            | B11<br>D-Mannitol           | B12<br>L-Glutamic<br>Acid |
| C1<br>D-Glucose-<br>6-Phosphate  | C2<br>D-Galactonic<br>Acid- $\gamma$ -lactone | C3<br>D,L-Malic Acid                     | C4<br>D-Ribose                   | C5<br>Tween 20             | C6<br>L-Rhamnose                                              | C7<br>D-Fructose                            | C8<br>Acetic Acid                          | C9<br>$\alpha$ -D-Glucose          | C10<br>Maltose                | C11<br>D-Melibiose          | C12<br>Thymidine          |
| D1<br>L-Asparagine               | D2<br>D-Aspartic Acid                         | D3<br>D-Glucosaminic<br>Acid             | D4<br>1,2-Propanediol            | D5<br>Tween 40             | D6<br>$\alpha$ -Keto-Glutaric<br>Acid                         | D7<br>$\alpha$ -Keto-Butyric<br>Acid        | D8<br>$\alpha$ -Methyl-D-<br>Galactoside   | D9<br>$\alpha$ -D-Lactose          | D10<br>Lactulose              | D11<br>Sucrose              | D12<br>Uridine            |
| E1<br>L-Glutamine                | E2<br>M-Tartaric Acid                         | E3<br>D-Glucose-<br>1-Phosphate          | E4<br>D-Fructose-<br>6-Phosphate | E5<br>Tween 80             | E6<br>$\alpha$ -Hydroxy<br>Glutaric Acid<br>$\gamma$ -Lactone | E7<br>$\alpha$ -Hydroxy<br>Butyric Acid     | E8<br>$\beta$ -Methyl-D-<br>Glucoside      | E9<br>Adonitol                     | E10<br>Maltotriose            | E11<br>2-Deoxy<br>Adenosine | E12<br>Adenosine          |
| F1<br>Glycyl-L-<br>Aspartic Acid | F2<br>Citric Acid                             | F3<br>M-Inositol                         | F4<br>D-Threonine                | F5<br>Fumaric Acid         | F6<br>Bromo Succinic<br>Acid                                  | F7<br>Propionic Acid                        | F8<br>Mucic Acid                           | F9<br>Glycolic Acid                | F10<br>Glyoxylic Acid         | F11<br>D-Cellobiose         | F12<br>Inosine            |
| G1<br>Glycyl-L-<br>Glutamic Acid | G2<br>Tricarballic<br>Acid                    | G3<br>L-Serine                           | G4<br>L-Threonine                | G5<br>L-Alanine            | G6<br>L-Alanyl-<br>Glycine                                    | G7<br>Acetoacetic<br>Acid                   | G8<br>N-Acetyl- $\beta$ -D-<br>Mannosamine | G9<br>Mono Methyl<br>Succinate     | G10<br>Methyl<br>Pyruvate     | G11<br>D-Malic Acid         | G12<br>L-Malic Acid       |
| H1<br>Glycyl-L-<br>Proline       | H2<br>p-Hydroxy<br>Phenyl Acetic<br>Acid      | H3<br>m-Hydroxy<br>Phenyl Acetic<br>Acid | H4<br>Tyramine                   | H5<br>D-Psicose            | H6<br>L-Lyxose                                                | H7<br>Glucuronamide                         | H8<br>Pyruvic Acid                         | H9<br>L-Galactonic<br>Acid-Lactone | H10<br>D-Galacturonic<br>Acid | H11<br>Phenylethylamine     | H12<br>2-Aminoethanol     |

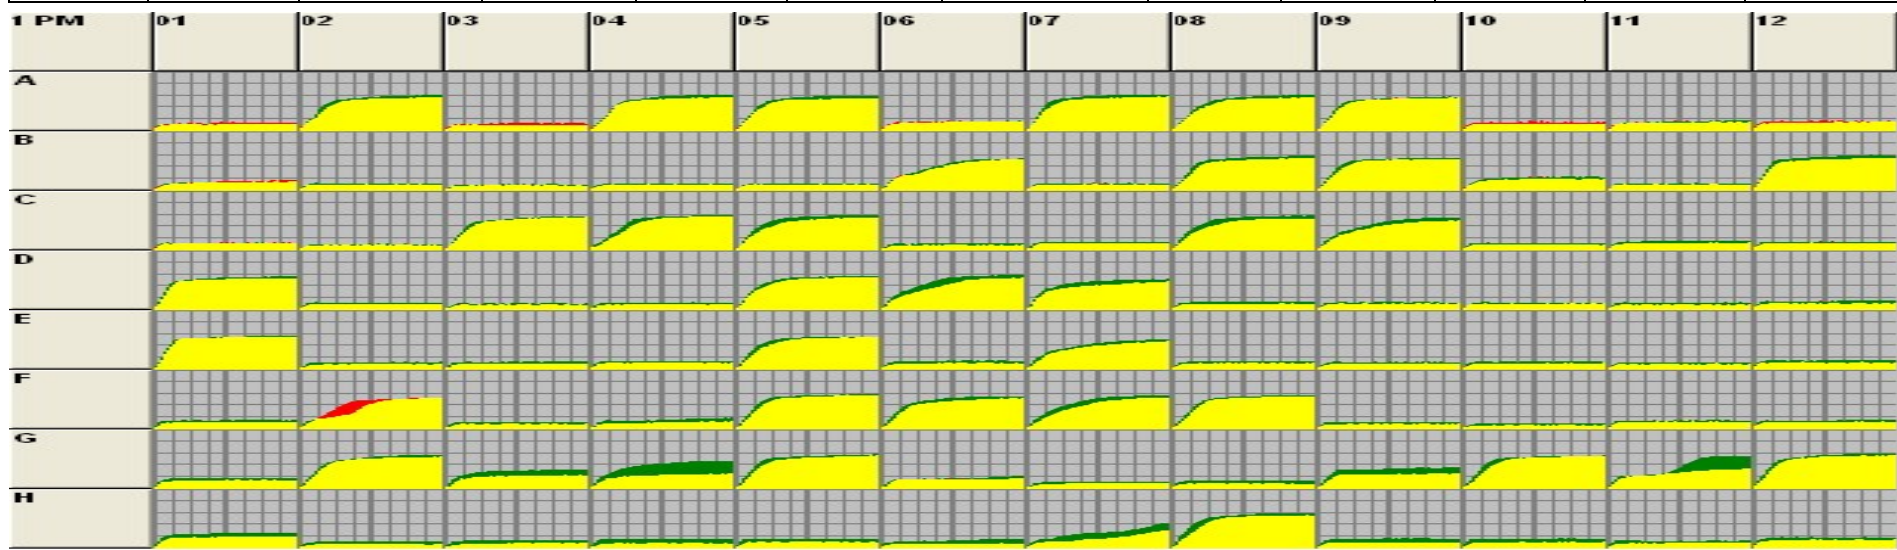

PM2A MicroPlate™ CarbonSources

|                                  |                                |                                |                       |                       |                              |                              |                              |                                  |                             |                             |                                             |
|----------------------------------|--------------------------------|--------------------------------|-----------------------|-----------------------|------------------------------|------------------------------|------------------------------|----------------------------------|-----------------------------|-----------------------------|---------------------------------------------|
| A1<br>Negative Control           | A2<br>Chondroitin Sulfate C    | A3<br>α-Cyclodextrin           | A4<br>β-Cyclodextrin  | A5<br>γ-Cyclodextrin  | A6<br>Dextrin                | A7<br>Gelatin                | A8<br>Glycogen               | A9<br>Inulin                     | A10<br>Laminarin            | A11<br>Mannan               | A12<br>Pectin                               |
| B1<br>N-Acetyl-D-Galactosamine   | B2<br>N-Acetyl-Neuraminic Acid | B3<br>β-D-Allose               | B4<br>Amygdalin       | B5<br>D-Arabinose     | B6<br>D-Arabitol             | B7<br>L-Arabitol             | B8<br>Arbutin                | B9<br>2-Deoxy-D-Ribose           | B10<br>l-Erythritol         | B11<br>D-Fucose             | B12<br>3-O-β-D-Galactopyranosyl D-Arabinose |
| C1<br>Gentiobiose                | C2<br>L-Glucose                | C3<br>Lactitol                 | C4<br>D-Melezitose    | C5<br>Maltitol        | C6<br>α-Methyl-D-Glucoside   | C7<br>β-Methyl-D-Galactoside | C8<br>3-Methyl Glucose       | C9<br>β-Methyl-D-Glucuronic Acid | C10<br>α-Methyl-D-Mannoside | C11<br>β-Methyl-D-Xyloside  | C12<br>Palatinose                           |
| D1<br>D-Raffinose                | D2<br>Salicin                  | D3<br>Sedoheptulosa            | D4<br>L-Sorbose       | D5<br>Stachyose       | D6<br>D-Tagatose             | D7<br>Turanose               | D8<br>Xylitol                | D9<br>N-Acetyl-D-Glucosaminitol  | D10<br>γ-Amino Butyric Acid | D11<br>d-Amino Valeric Acid | D12<br>Butyric Acid                         |
| E1<br>Capric Acid                | E2<br>Caproic Acid             | E3<br>Citraconic Acid          | E4<br>Citramalic Acid | E5<br>D-Glucosamine   | E6<br>2-Hydroxy Benzoic Acid | E7<br>4-Hydroxy Benzoic Acid | E8<br>β-Hydroxy Butyric Acid | E9<br>γ-Hydroxy Butyric Acid     | E10<br>α-Keto Valeric Acid  | E11<br>Itaconic Acid        | E12<br>5-Keto-D-Gluconic Acid               |
| F1<br>D-Lactic Acid Methyl Ester | F2<br>Malonic Acid             | F3<br>Melibionc Acid           | F4<br>Oxalic Acid     | F5<br>Oxalomalic Acid | F6<br>Quinic Acid            | F7<br>D-Ribono-1,4-Lactone   | F8<br>Sebacic Acid           | F9<br>Sorbic Acid                | F10<br>Succinamic Acid      | F11<br>D-Tartaric Acid      | F12<br>L-Tartaric Acid                      |
| G1<br>Acetamide                  | G2<br>L-Alaninamide            | G3<br>N-Acetyl-L-Glutamic Acid | G4<br>L-Arginine      | G5<br>Glycine         | G6<br>L-Histidine            | G7<br>L-Homoserine           | G8<br>Hydroxy-L-Proline      | G9<br>L-Isoleucine               | G10<br>L-Leucine            | G11<br>L-Lysine             | G12<br>L-Methionine                         |
| H1<br>L-Ornithine                | H2<br>L-Phenylalanine          | H3<br>L-Pyrogutamic Acid       | H4<br>L-Valine        | H5<br>D,L-Carnitine   | H6<br>Sec-Butylamine         | H7<br>D,L-Octopamine         | H8<br>Putrescine             | H9<br>Dihydroxy Acetone          | H10<br>2,3-Butanediol       | H11<br>2,3-Butanone         | H12<br>3-Hydroxy 2-Butanone                 |

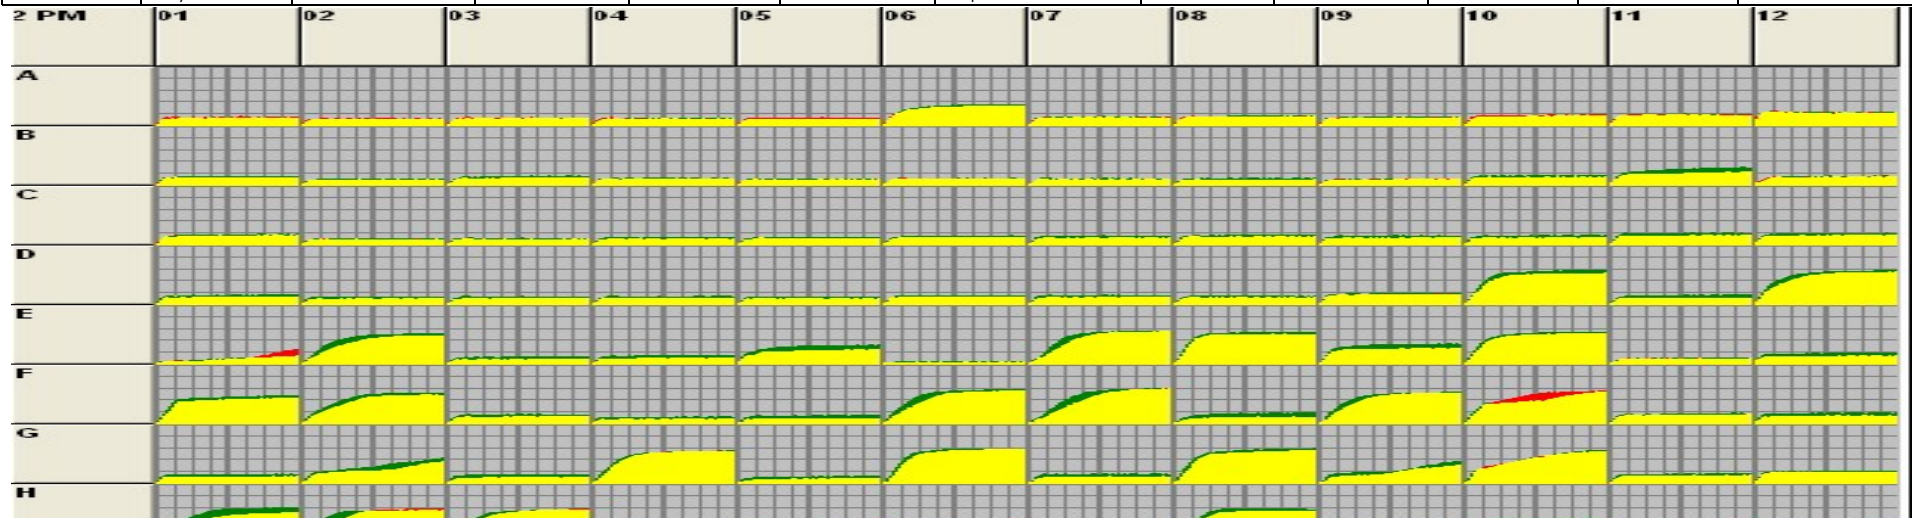

Supplement: IAI.00065-13_zii999090206so1.pdf [file IAI.00065-13_zii999090206so1.pdf]
